# Supplementary figures and images for: IV BCG Vaccination and Aerosol BCG Revaccination Induce Mycobacteria-Responsive γδ T Cells Associated with Protective Efficacy against M. tb Challenge
Source: MDPI journal article supplement (doi:10.3390/vaccines11101604), 2023-10-17

Fig S1

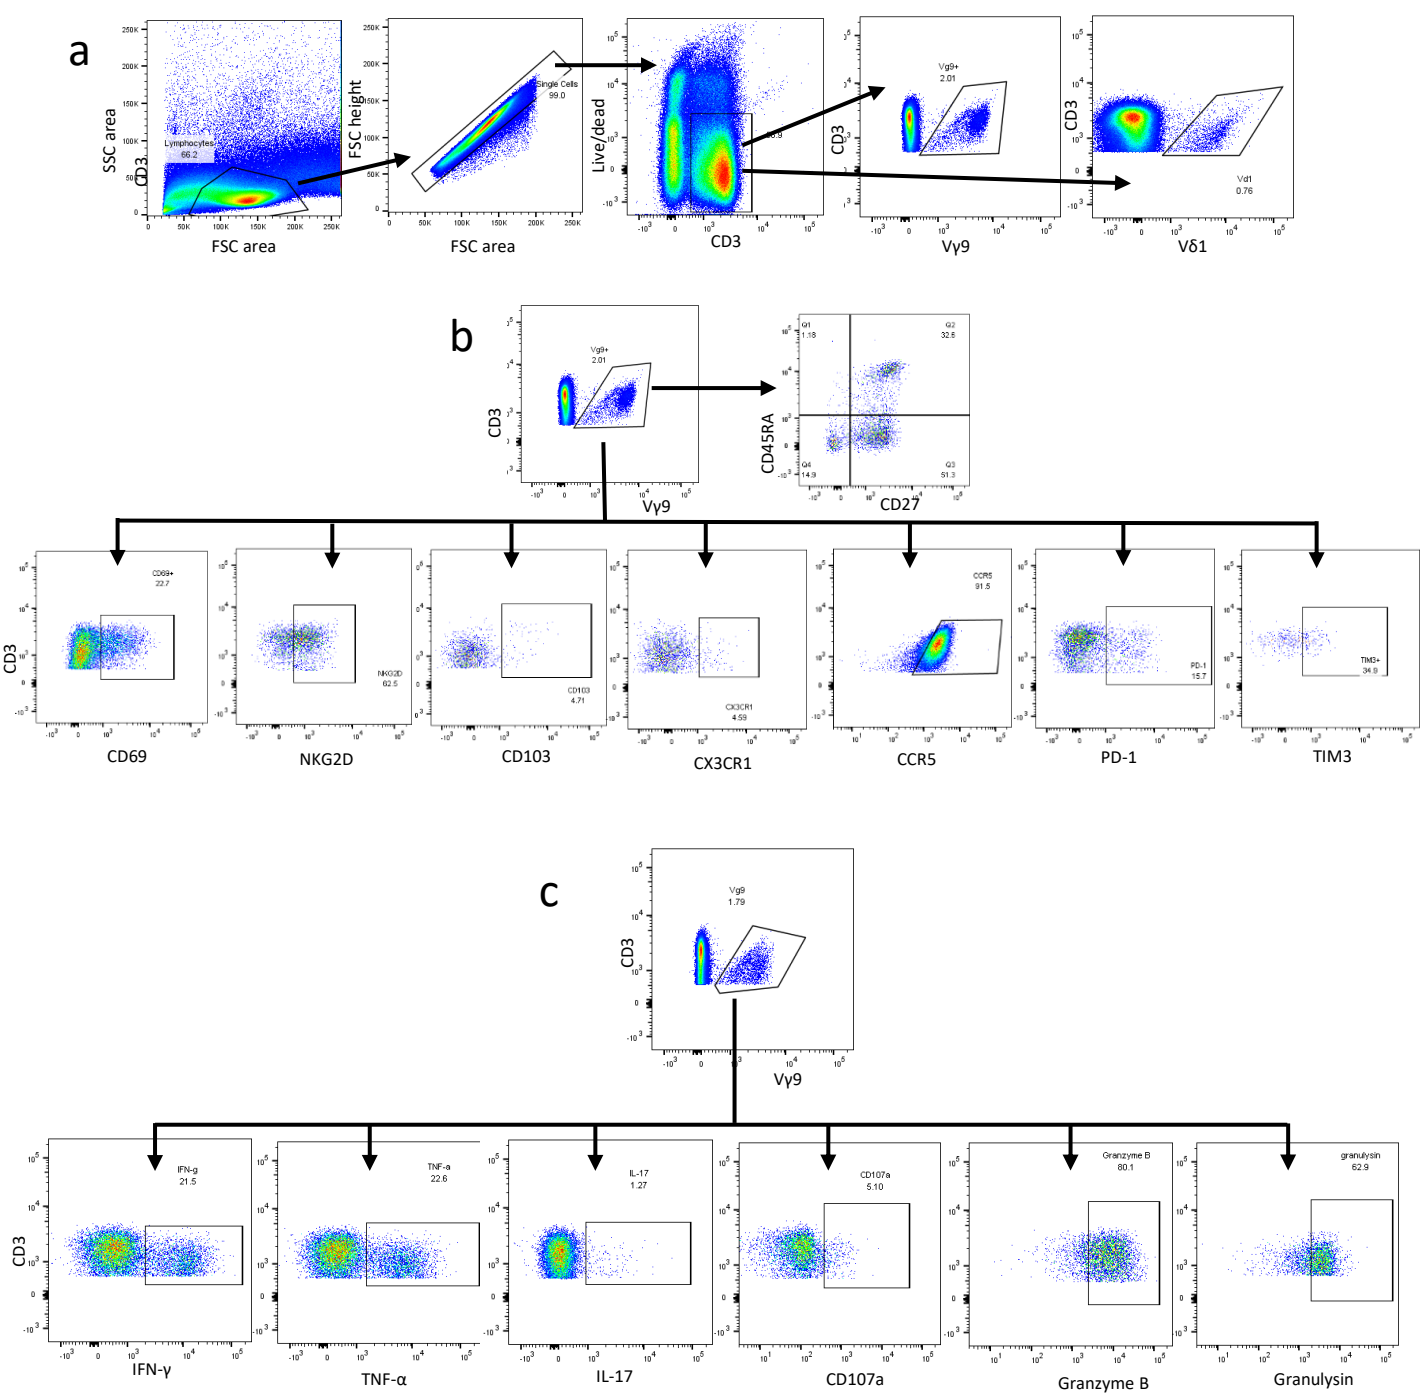

Fig S2

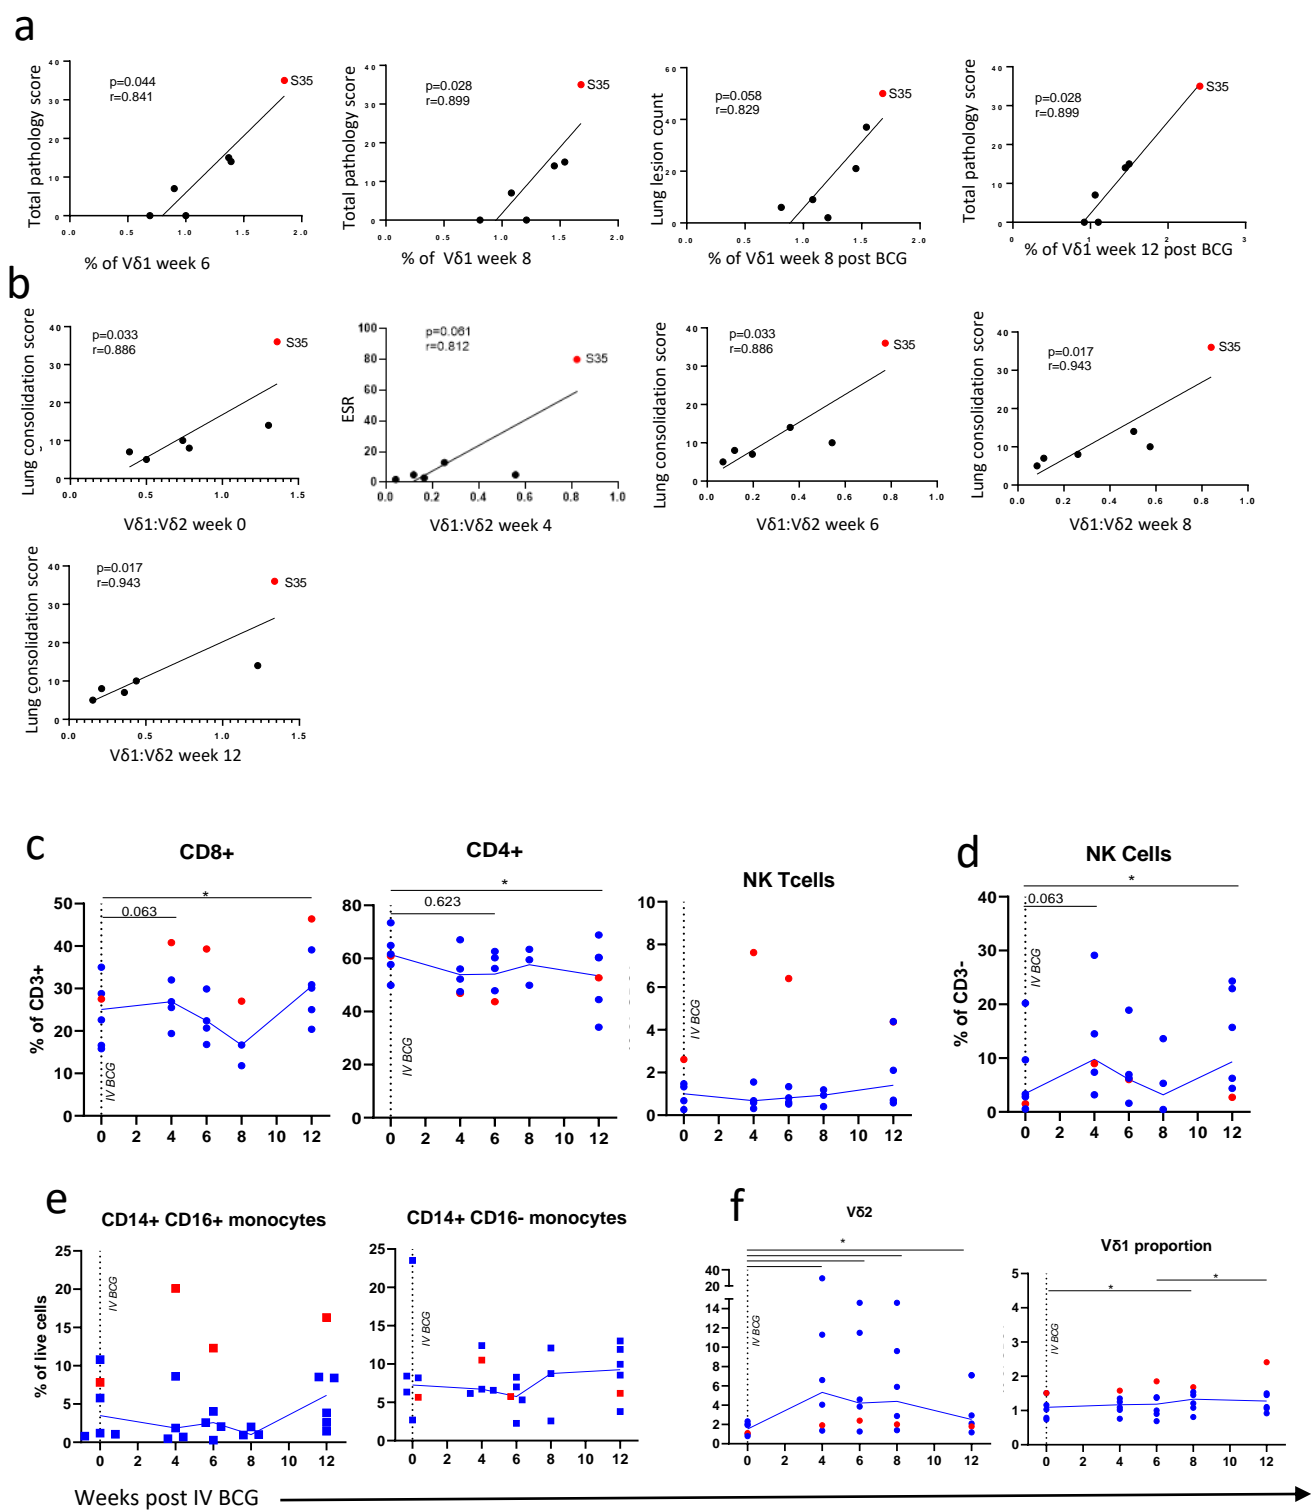

Supplement: s1 [file s1]
